# Supplementary material
Source: MDPI journal article supplement (https://www.mdpi.com/1996-1073/15/20/7635)
Supplement: s1 [file s1]

## Supporting Information

### Turning trash to treasure: Reusable glucose kit as a cell using ZnO derived from Metal organic framework (MOF) electrode for redox flow battery

L. Priya<sup>a</sup>, R. Subadevi<sup>a\*</sup>, M. Sivakumar<sup>a\*</sup>, V.Suryanarayanan<sup>b</sup>

<sup>a</sup>#120, Energy Materials Lab, Department of Physics, Science Block, Alagappa University, Karaikudi-630003, Tamil Nadu, India.

<sup>b</sup>Electro-organic Division, Central Electrochemical Research Institute, Karaikudi-630006, Tamil Nadu, India.

(\* Corresponding Author(s):

i) susiva73@yahoo.co.in & sivakumarm@alagappauniversity.ac.in (M.Sivakumar) &  
ii) susimsk@yahoo.co.in & subadevir@alagappauniversity.ac.in (R.Subadevi))

#### Table of contents

Figure S1: Voltage efficiency for this newly developed cell at current densities 5-20mA.cm<sup>-2</sup>

Figure S2: Coulombic efficiency at current densities 5-20 mA.cm<sup>-2</sup>

Figure S3: Energy efficiency at current densities 5-20 mA.cm<sup>-2</sup> for glucose kit as cell for redox flow battery

**Table S1.** coulombic, voltage, and energy efficiency of current densities ranging from 5-20 mA.cm<sup>-2</sup> and corresponding average charge discharge voltage

| <b>Current density<br/>(mA/C<br/>m<sup>2</sup>)</b> | <b>coulombic<br/>efficiency<br/>(%)</b> | <b>Average<br/>charge<br/>voltage (V)</b> | <b>Average<br/>discharge<br/>voltage(V)</b> | <b>Voltage<br/>efficiency<br/>(%)</b> | <b>Energy<br/>efficiency<br/>(%)</b> |
|-----------------------------------------------------|-----------------------------------------|-------------------------------------------|---------------------------------------------|---------------------------------------|--------------------------------------|
| 5                                                   | 23.7                                    | 1.99                                      | 1.84                                        | 92.4                                  | 21.8                                 |
| 10                                                  | 23.01                                   | 1.99                                      | 1.331                                       | 66.8                                  | 15.37                                |
| 15                                                  | 22.6                                    | 1.99                                      | 1.229                                       | 61                                    | 13.7                                 |
| 20                                                  | 20.7                                    | 1.992                                     | 1.107                                       | 55.4                                  | 11.46                                |

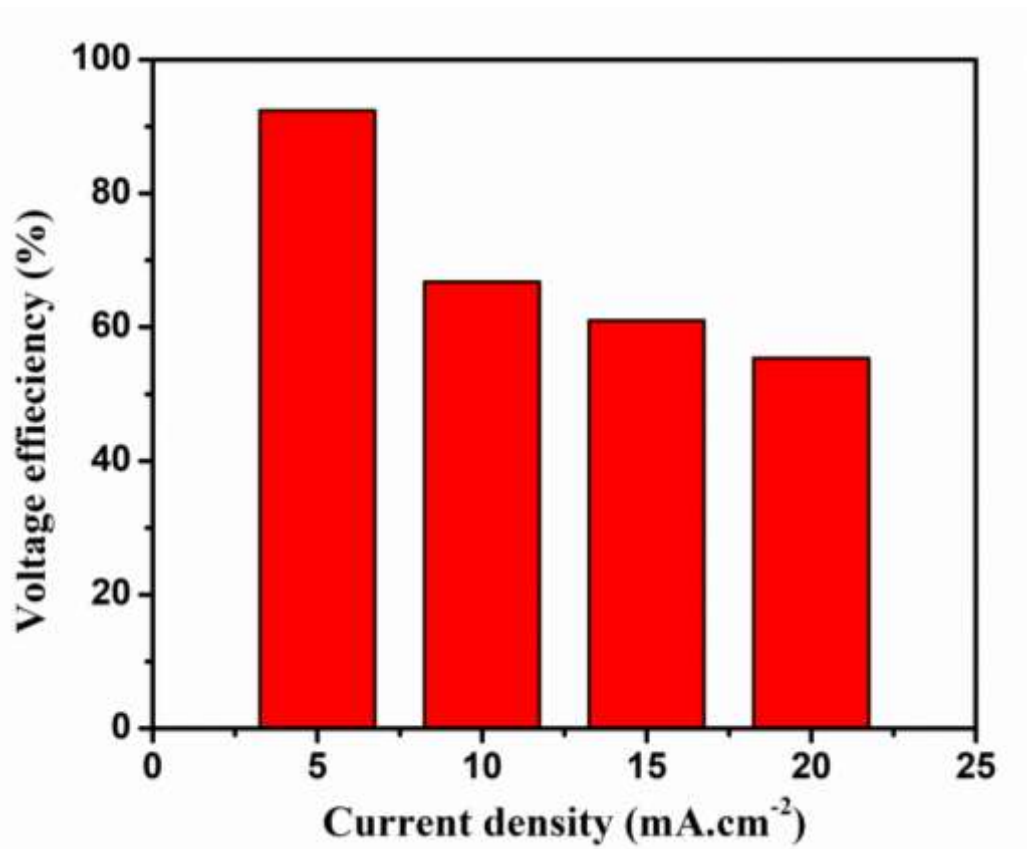

**Figure S1.** Voltage efficiency for this newly developed cell at current densities 5-20mA.cm<sup>-2</sup>

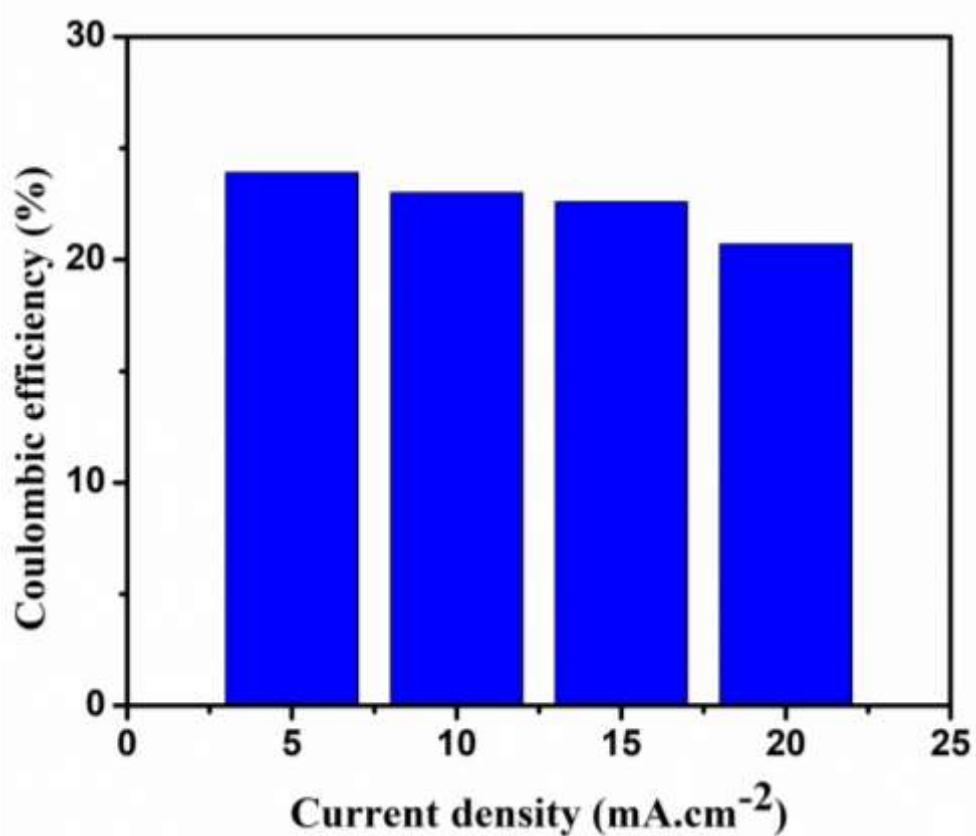

**Figure S2.** Coulombic efficiency at current densities 5-20 mA.cm<sup>-2</sup>

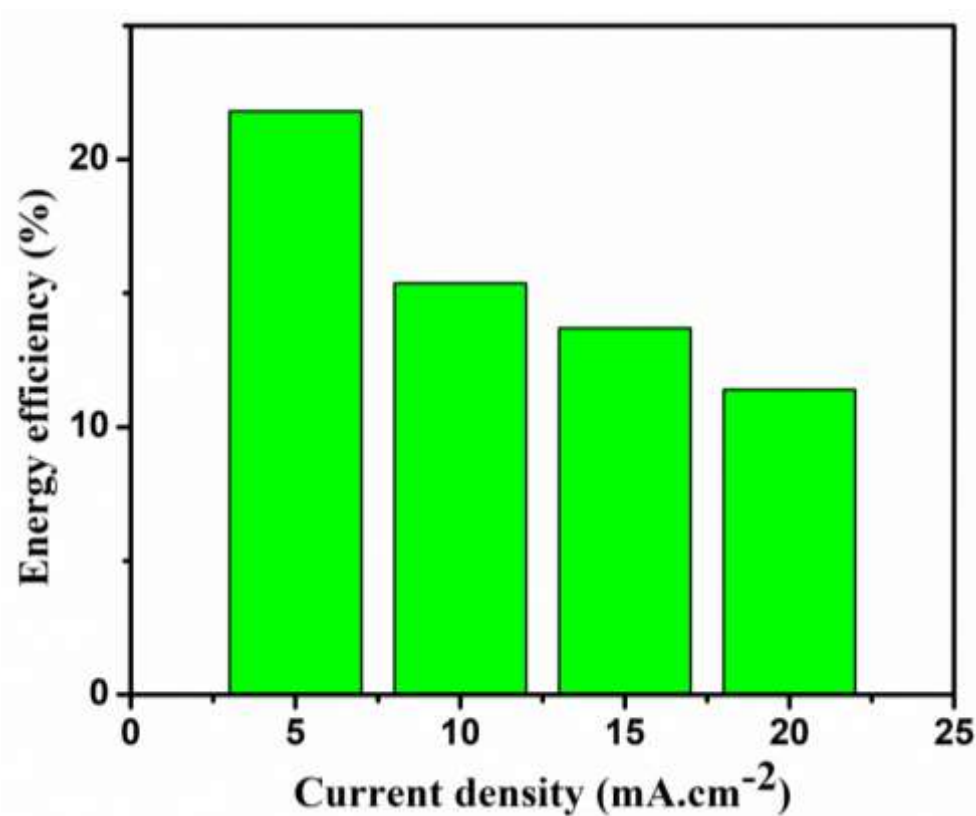

**Figure S3.** Energy efficiency at current densities 5-20 mA.cm<sup>-2</sup> for glucose kit as cell for redox flow battery
